# Supplementary material
Source: PubMed Central journal article supplement (PMC2986486)

Fig. 5

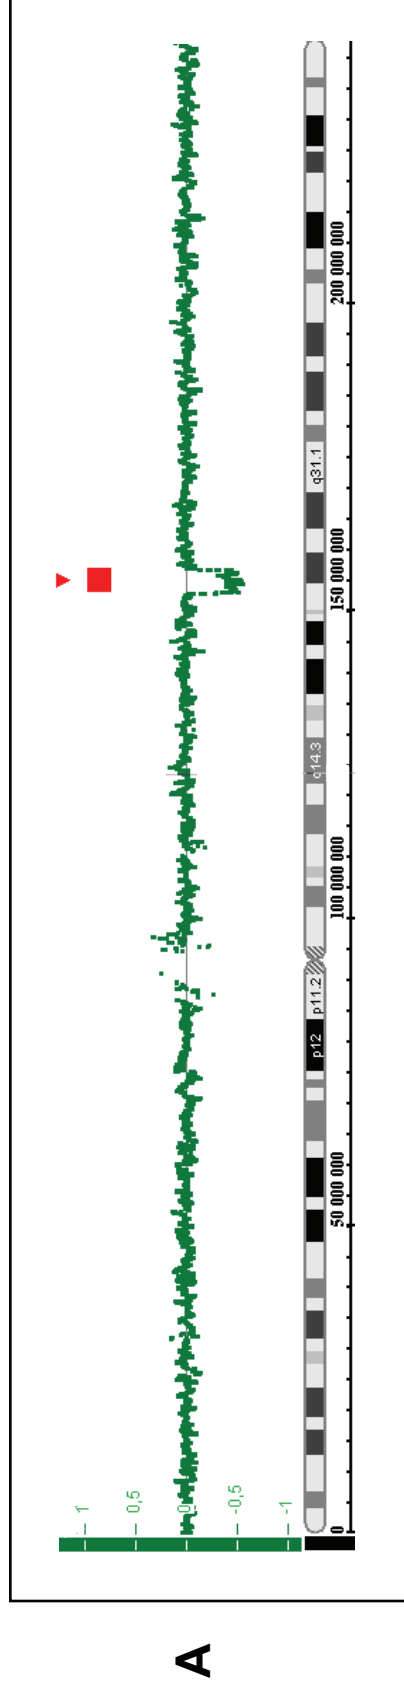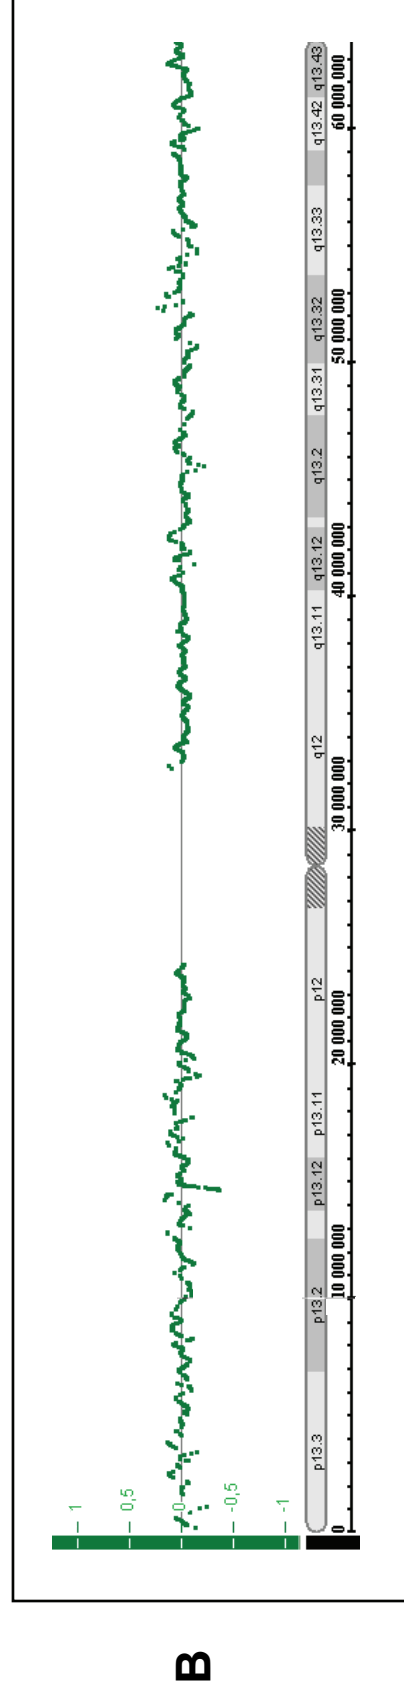

Supplement: ejhg2008261x3.pdf [file ejhg2008261x3.pdf]
